# Supplementary material for: Elevated transcription and glycosylation of B3GNT5 promotes breast cancer aggressiveness
Source: Springer Nature journal article supplement (doi:10.1186/s13046-022-02375-5), 2022-05-07

## Supplementary Materials

### Supplementary Figure Legends

#### Figure S1

(A) Box-plots indicated B3GNT5 mRNA expression in four different subtypes of breast cancer from the GSE22358 and MEBTABRIC datasets. Comparisons are made using the two-tailed Student's t-test.

(B) Histograms indicated B3GNT5 mRNA expression in different luminal and BLBC cell lines from four datasets (GSE12777, GSE16732, GSE10890 and E-TAMB-181).

#### Figure S2

(A) Box-plots indicated the correlation of B3GNT5 mRNA expression with its copy number variants status (gain, diploid and deletion) in breast cancer from the CCLE dataset.

(B) Box-plots showed the association of B3GNT5 mRNA level with copy number variants (gain, diploid and deletion) in different subtypes of breast cancer from the CCLE dataset.

(C) Analysis of the correlation between B3GNT5 mRNA expression and its copy number status (gain or no gain) in breast cancer from the CCLE dataset.

(D, E) Box-plots indicated B3GNT5 promoter methylation in different subtypes of breast cancer (TCGA dataset) (D) and breast cancer cell lines (GSE44837 dataset) (E).

(F, G) Analysis of the mRNA expression and methylation of B3GNT5 from the TCGA dataset (F) and GSE44837 dataset (G). The relative level of B3GNT5 mRNA was plotted against that of B3GNT5 methylation. Comparisons are made using the two-tailed Student's t-test. The relative level of B3GNT5 mRNA was plotted against that of B3GNT5 methylation. Comparisons are made using the two-tailed Student's t-test.

(H) Analysis of the methylation status of B3GNT5 promoter regions in different subtypes of breast cancer cell lines.

#### Figure S3

(A) B3GNT5 knockout in MDA-MB231, BT549 and SUM159 cells using CRISPR–Cas9 technology. Knockout results were verified by DNA sequencing.

#### Figure S4

(A) Growth of indicated cell lines with stable empty vector or B3GNT5-WT-Flag re-expression was measured by cell-count assay for 2 days.

(B) Mammosphere formation of SUM159 cells with or without B3GNT5 knockout.

(C) Population of CSCs (CD44<sup>high</sup>/CD24<sup>low</sup>) was analyzed by flow cytometry in SUM159 cells with or without B3GNT5 knockout. Data are shown as a percentage of WT cell line. \* $p < 0.05$  by Student's t test. Data are shown as mean  $\pm$  SD based on three independent experiments.

(D) Expression of B3GNT5 was detected by Western blotting in MDA-MB231 KO and BT549 KO cells with stable empty vector or B3GNT5-WT-mcherry cDNA.

(E) Extreme limiting dilution analysis of sphere formation in B3GNT5 expressing MDA-231 KO and BT549 KO cell lines *in vitro*.

#### Figure S5

(A) Soft-agar assay was performed using SUM159 cells with or without B3GNT5 knockout. Data are shown as a percentage of WT cell line. \* $p < 0.05$  by Student's t test. Data are shown as mean  $\pm$  SD based on three independent experiments.

(B) Box-plots indicated B3GNT5 mRNA expression in different histological grades of breast cancer from GSE22358, NKI295 and MEBTABRIC datasets. Comparisons between two groups are made using the two-tailed Student's t-test.

(C) Kaplan-Meier survival analysis for OS, RFS and DMFS of patients in an aggregate breast cancer dataset according to B3GNT5 expression status. The p-value is determined using the log-rank test.

#### Figure S6

- (A) MDA-MB231 and BT549 cells with B3GNT5-WT-mcherry expression were treated with TM (2.5  $\mu\text{g}/\text{mL}$ ) for 24 h.
- (B) MDA-MB231 and BT549 cells expressing B3GNT5-WT-Flag or B3GNT5-4NQ-Flag were treated with MG132 (20  $\mu\text{M}$ ) for 8 h. B3GNT5 protein level was detected by Western blotting.

Supplementary Figures

Figure S1

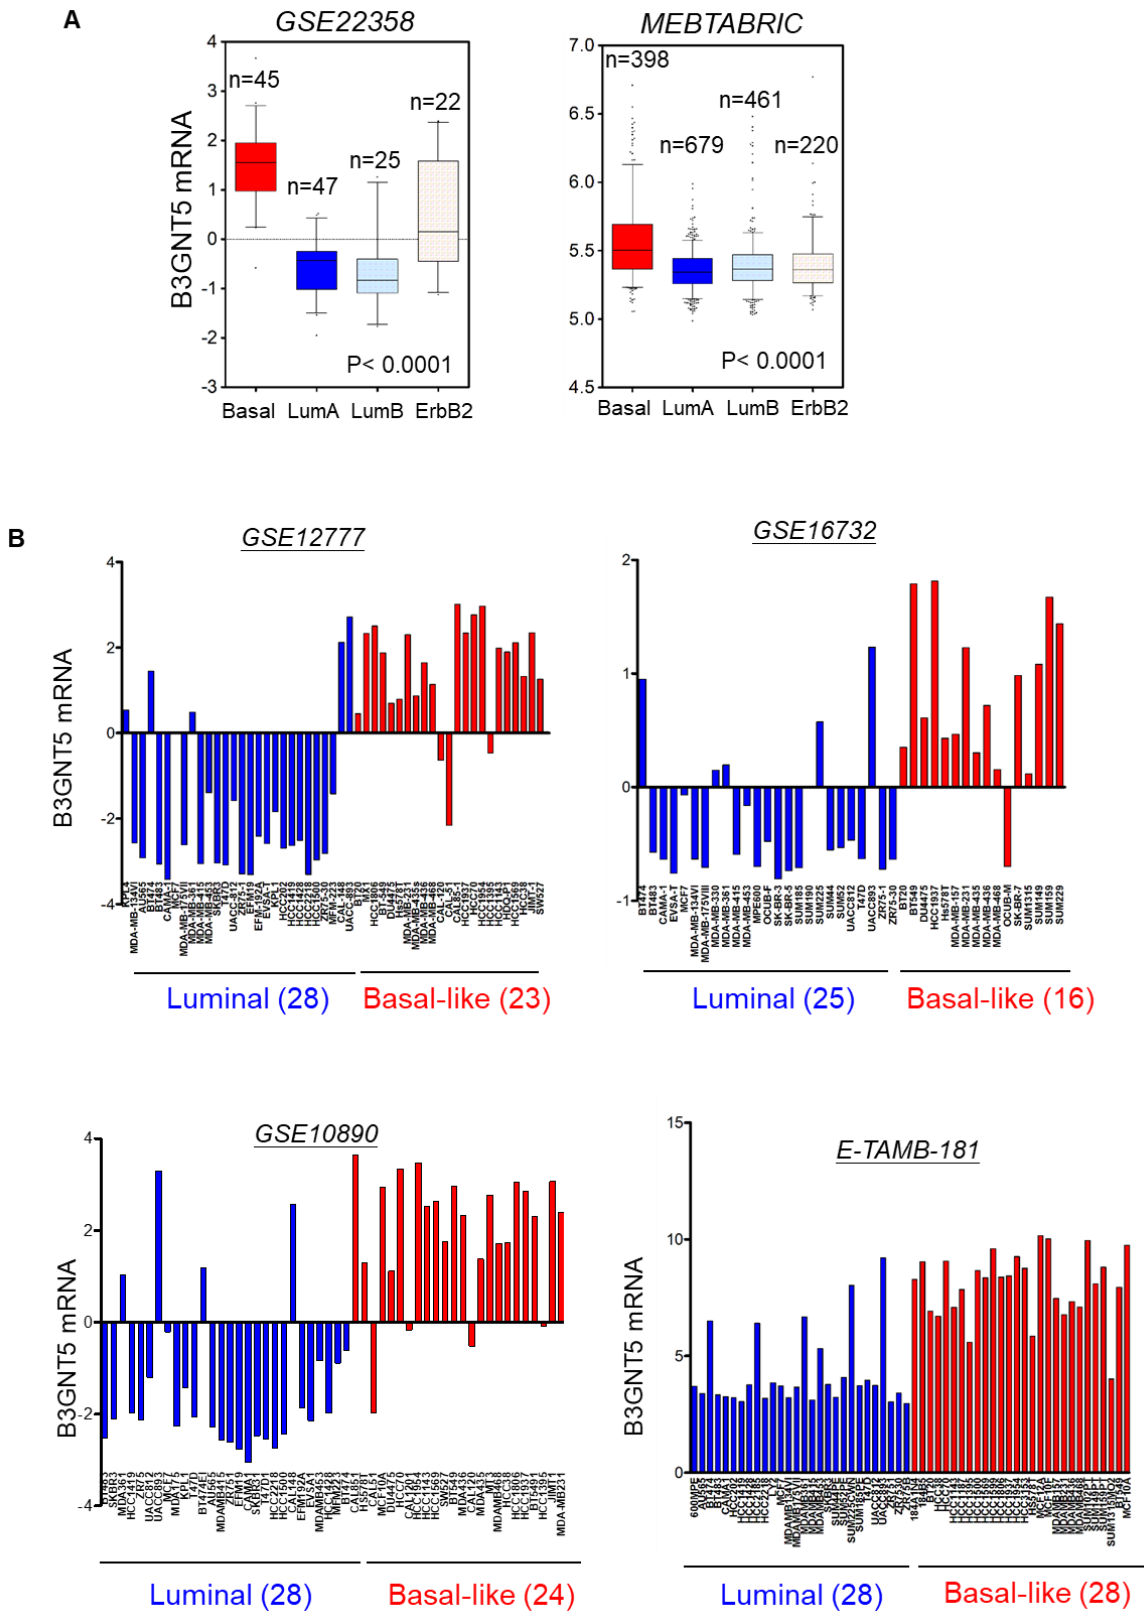

**Figure S2**

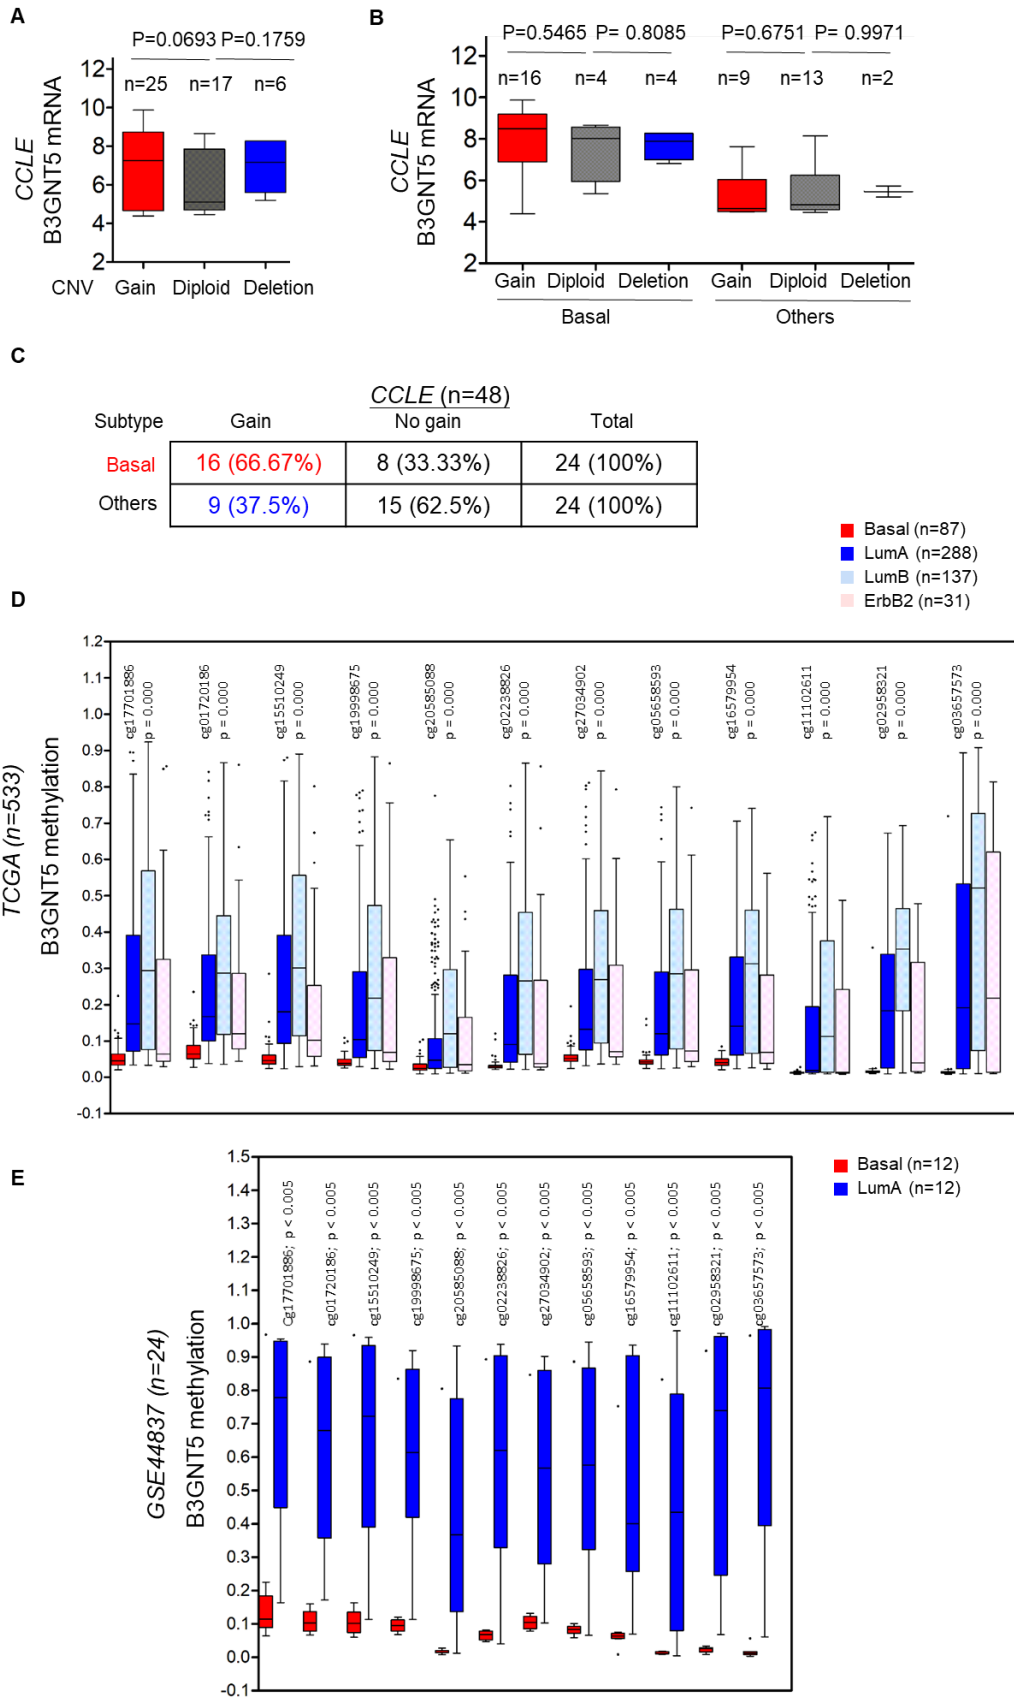

F

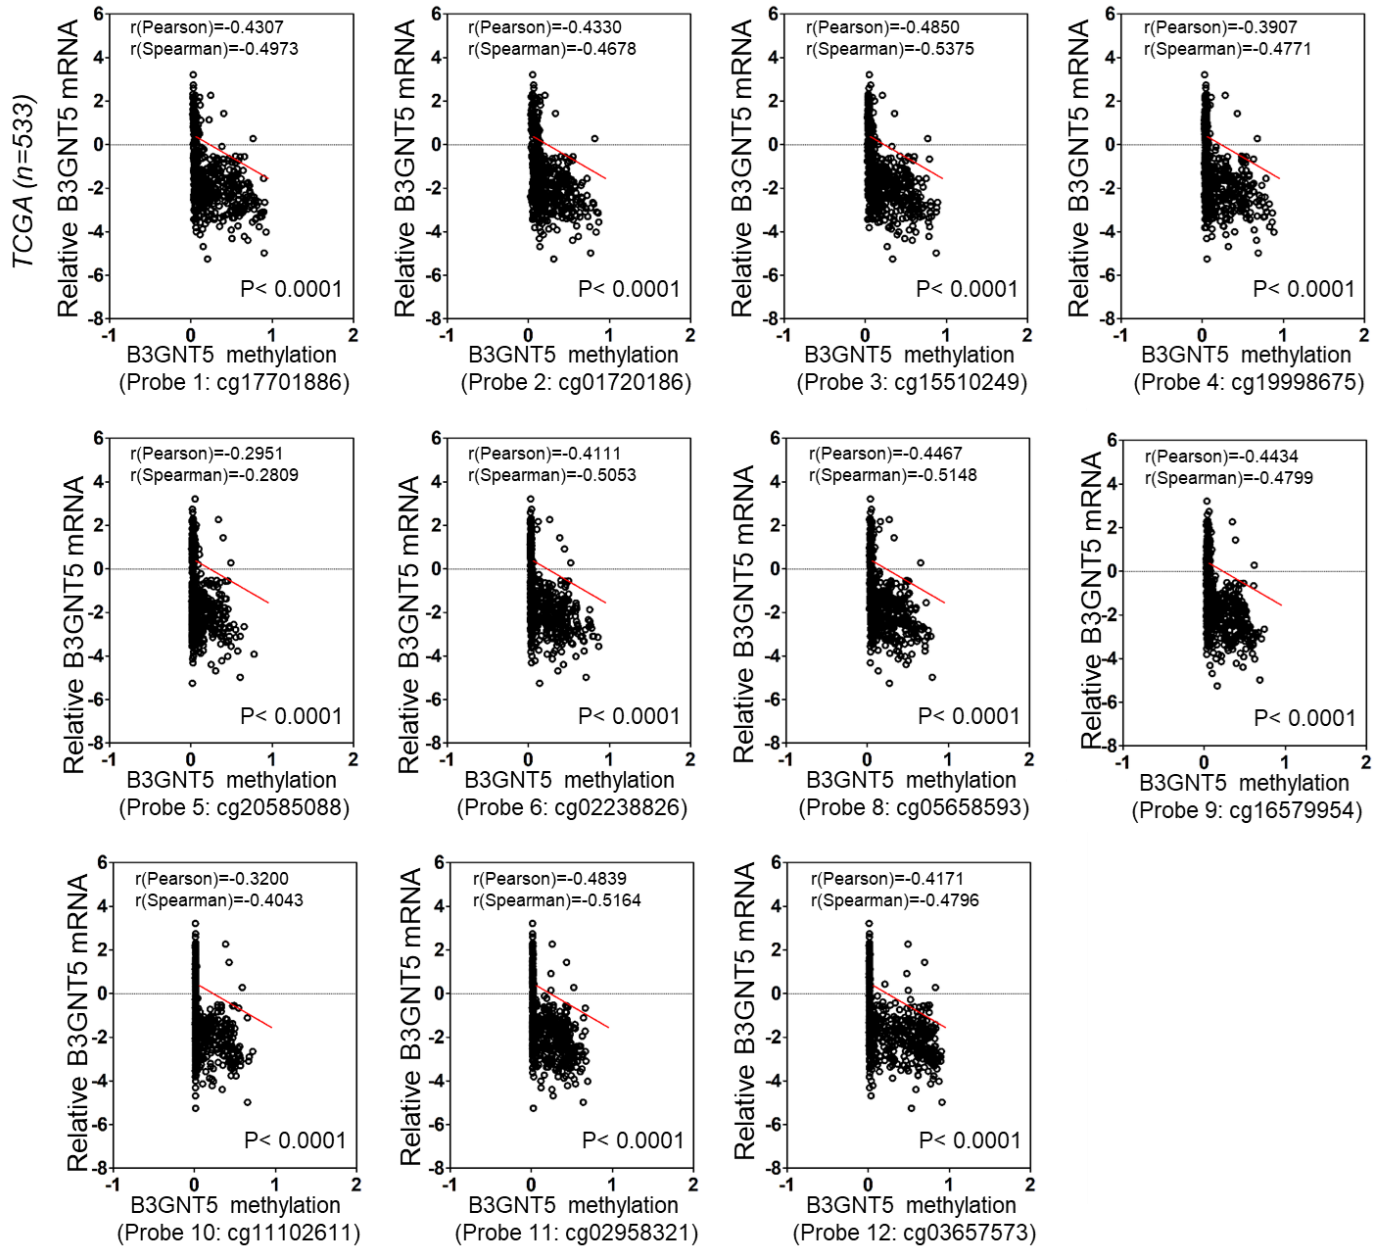

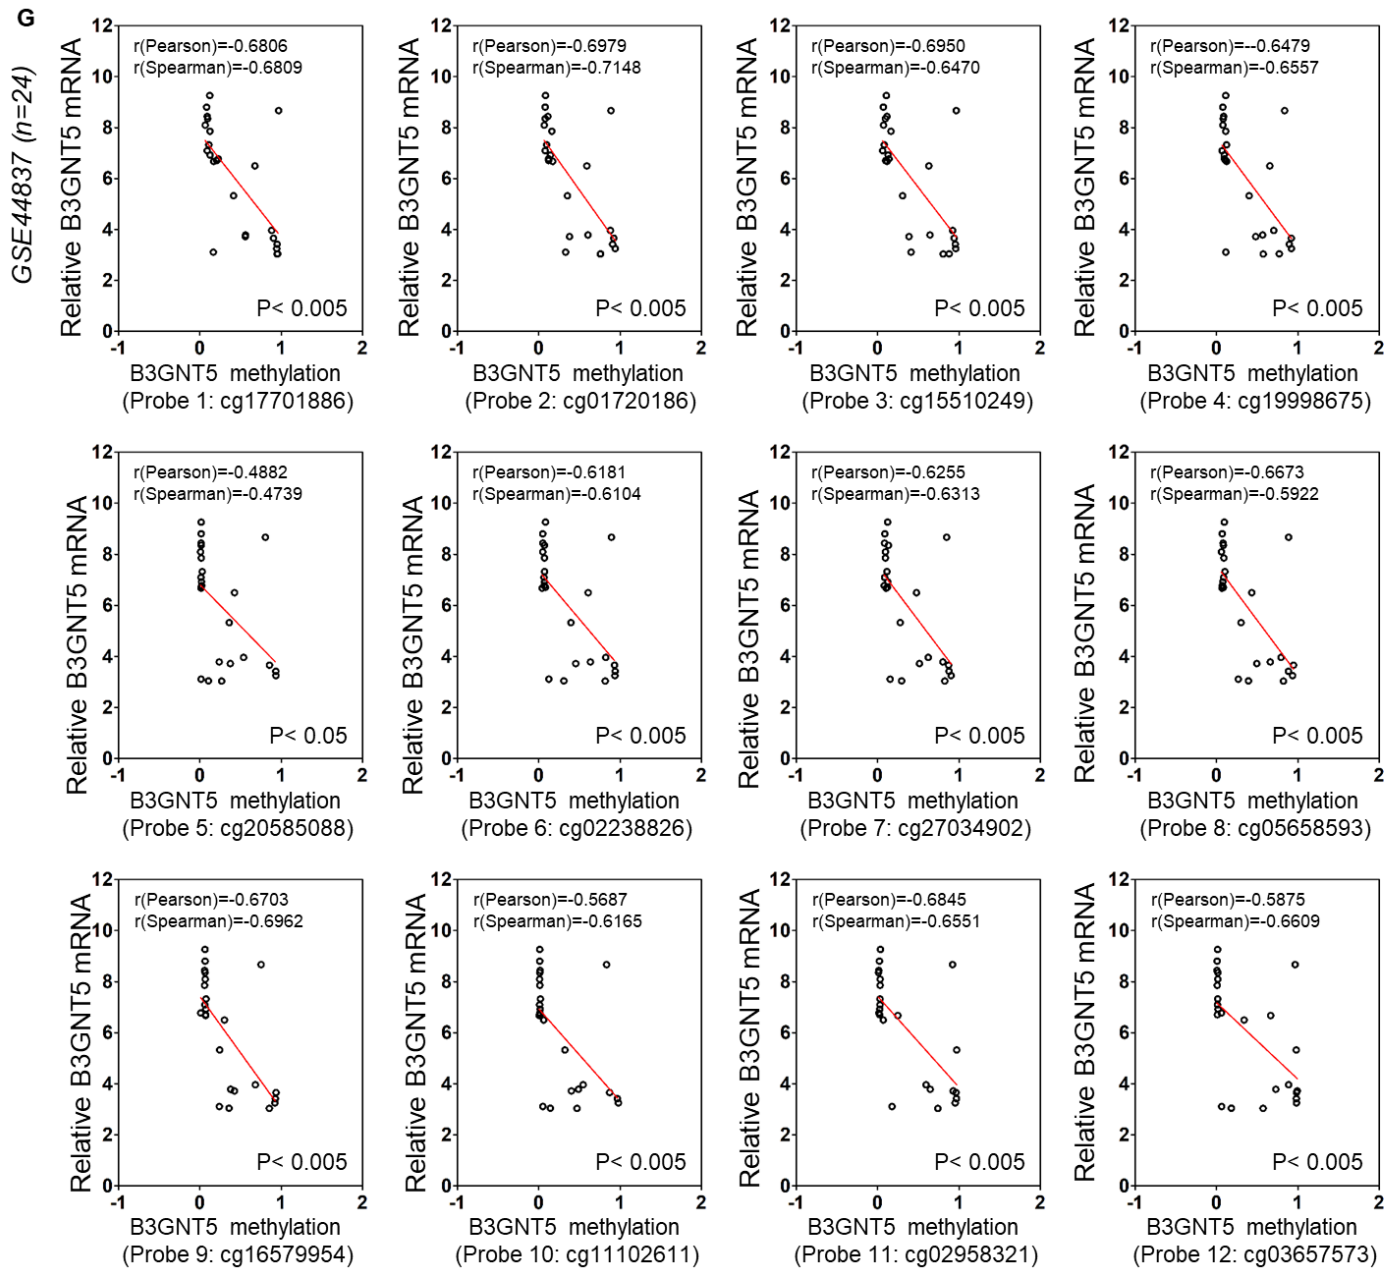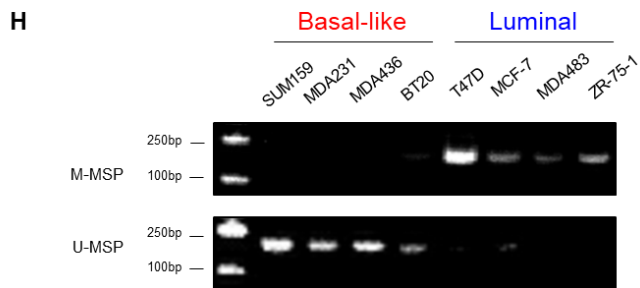

Figure S3

A

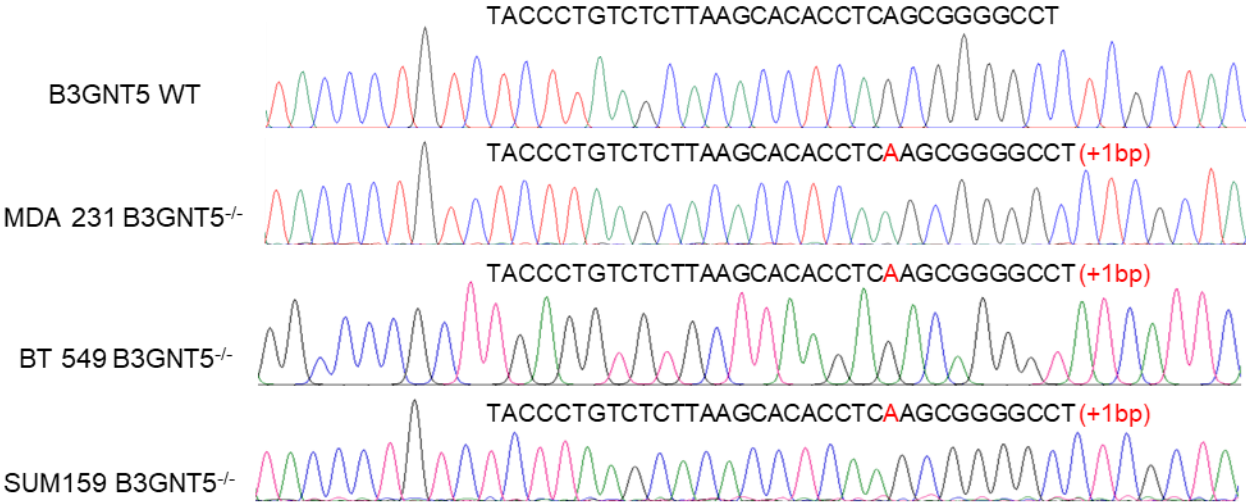



**Figure S4**

**A**

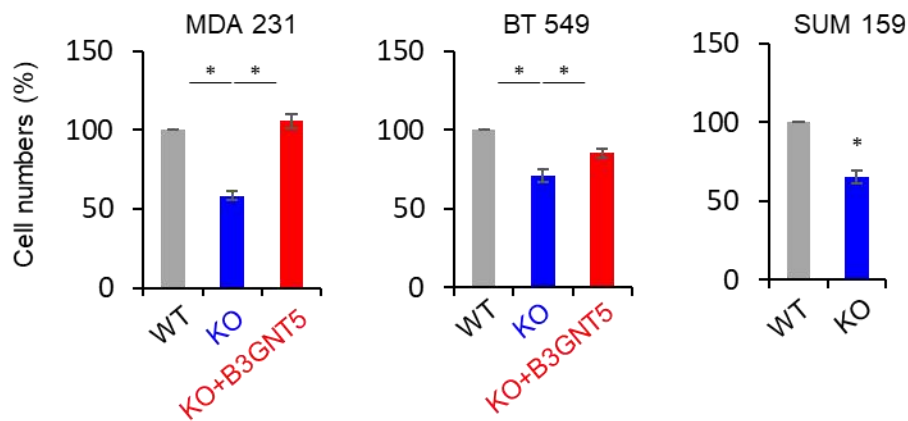

**B**

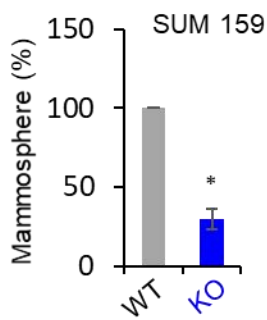

**C**

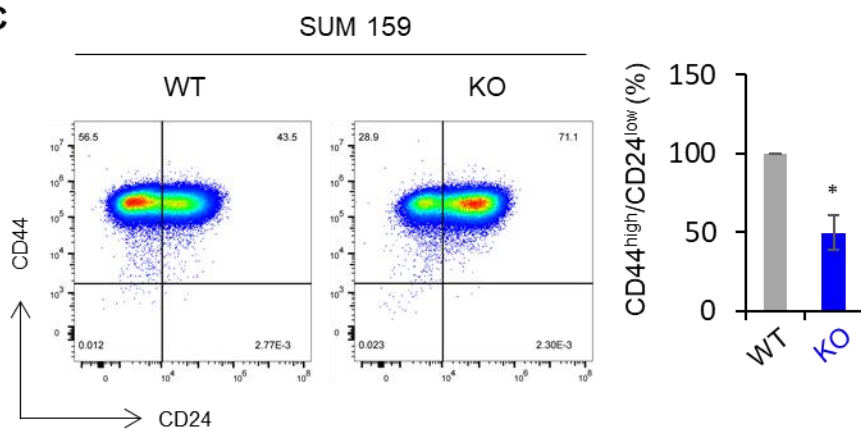

**D**

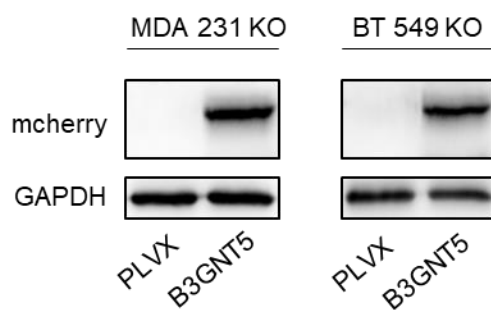

**E**

| Number of cells seeded             | MDA 231 KO                  |                             | BT 549 KO                   |                             |
|------------------------------------|-----------------------------|-----------------------------|-----------------------------|-----------------------------|
|                                    | mCherry Low                 | mCherry High                | mCherry Low                 | mCherry High                |
| 5                                  | 5/48                        | 15/48                       | 3/20                        | 4/20                        |
| 10                                 | 13/48                       | 31/48                       | 5/20                        | 8/20                        |
| 20                                 | 20/48                       | 39/48                       | 9/20                        | 13/20                       |
| 40                                 | 22/24                       | 24/24                       | 15/20                       | 20/20                       |
| Stem cell frequency (95% interval) | 1/30.5<br>(1/39.3 - 1/23.8) | 1/11.5<br>(1/14.1 - 1/9.37) | 1/31.9<br>(1/45.4 - 1/22.5) | 1/17.0<br>(1/23.2 - 1/12.5) |
| %                                  | 0.0327                      | 0.0869                      | 0.0313                      | 0.0588                      |
| p-value                            | <0.05                       |                             | <0.05                       |                             |

**Figure S5**

**A**

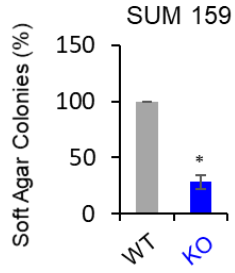

**B**

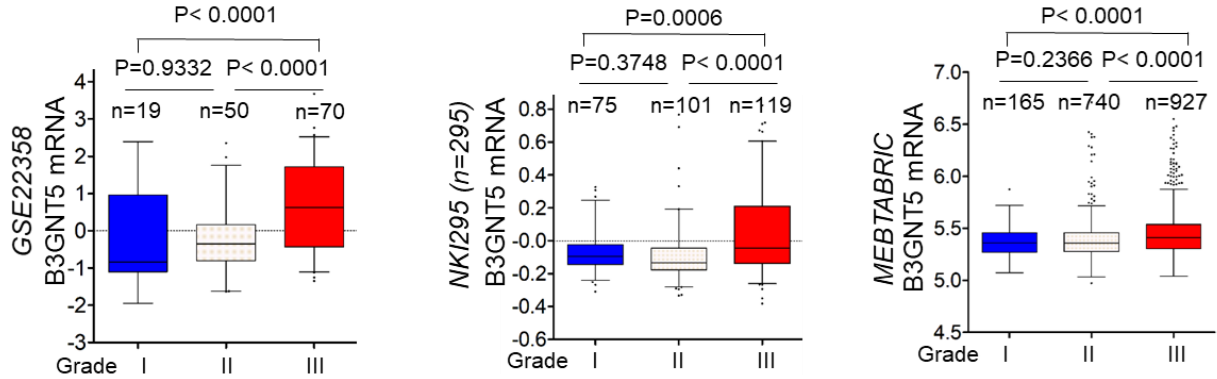

**C**

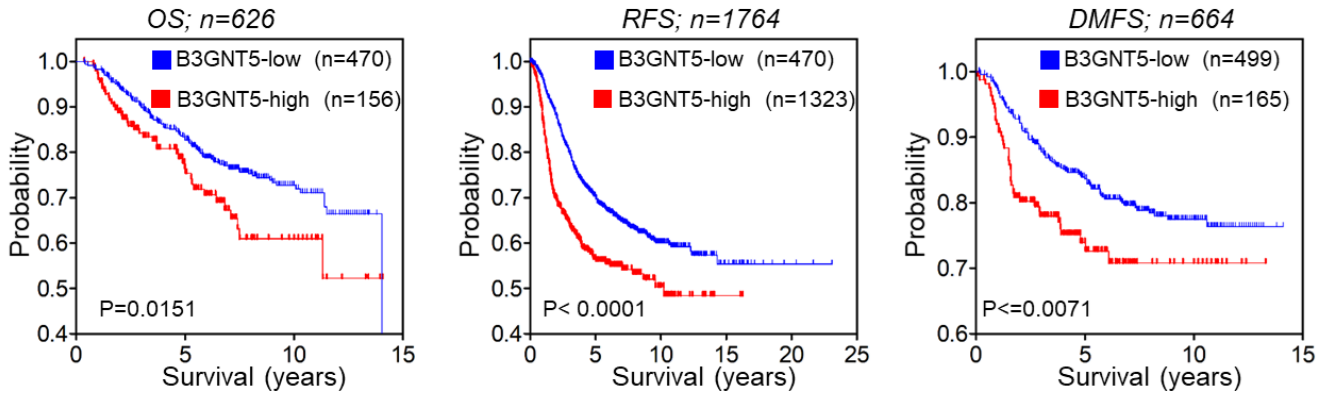

**Figure S6**

**A**

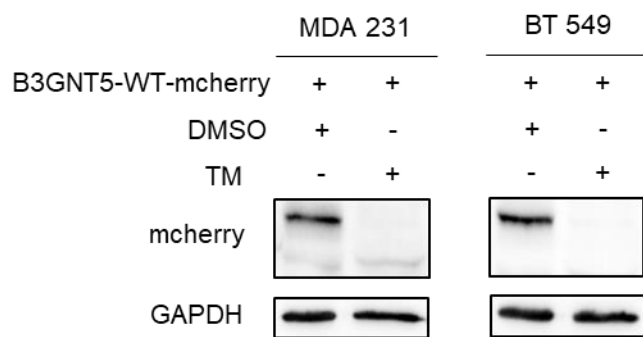

**B**

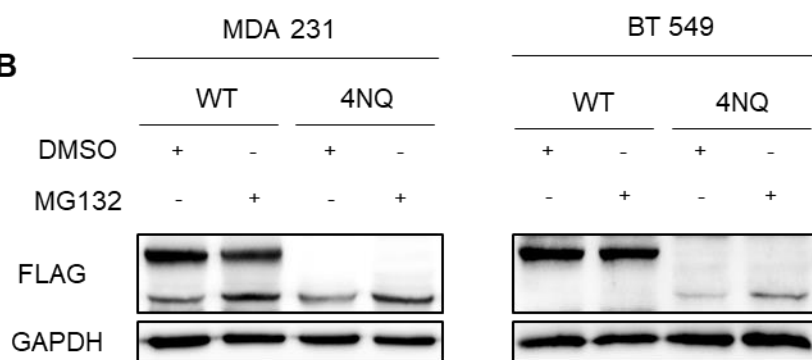

Supplement: MOESM2 [file 20381630]
